# Supplementary material
Source: Springer Nature journal article supplement (https://www.springermedizin.de/resource/supplementary/12879_2010_1507_MOESM2_ESM.pdf/9442702)

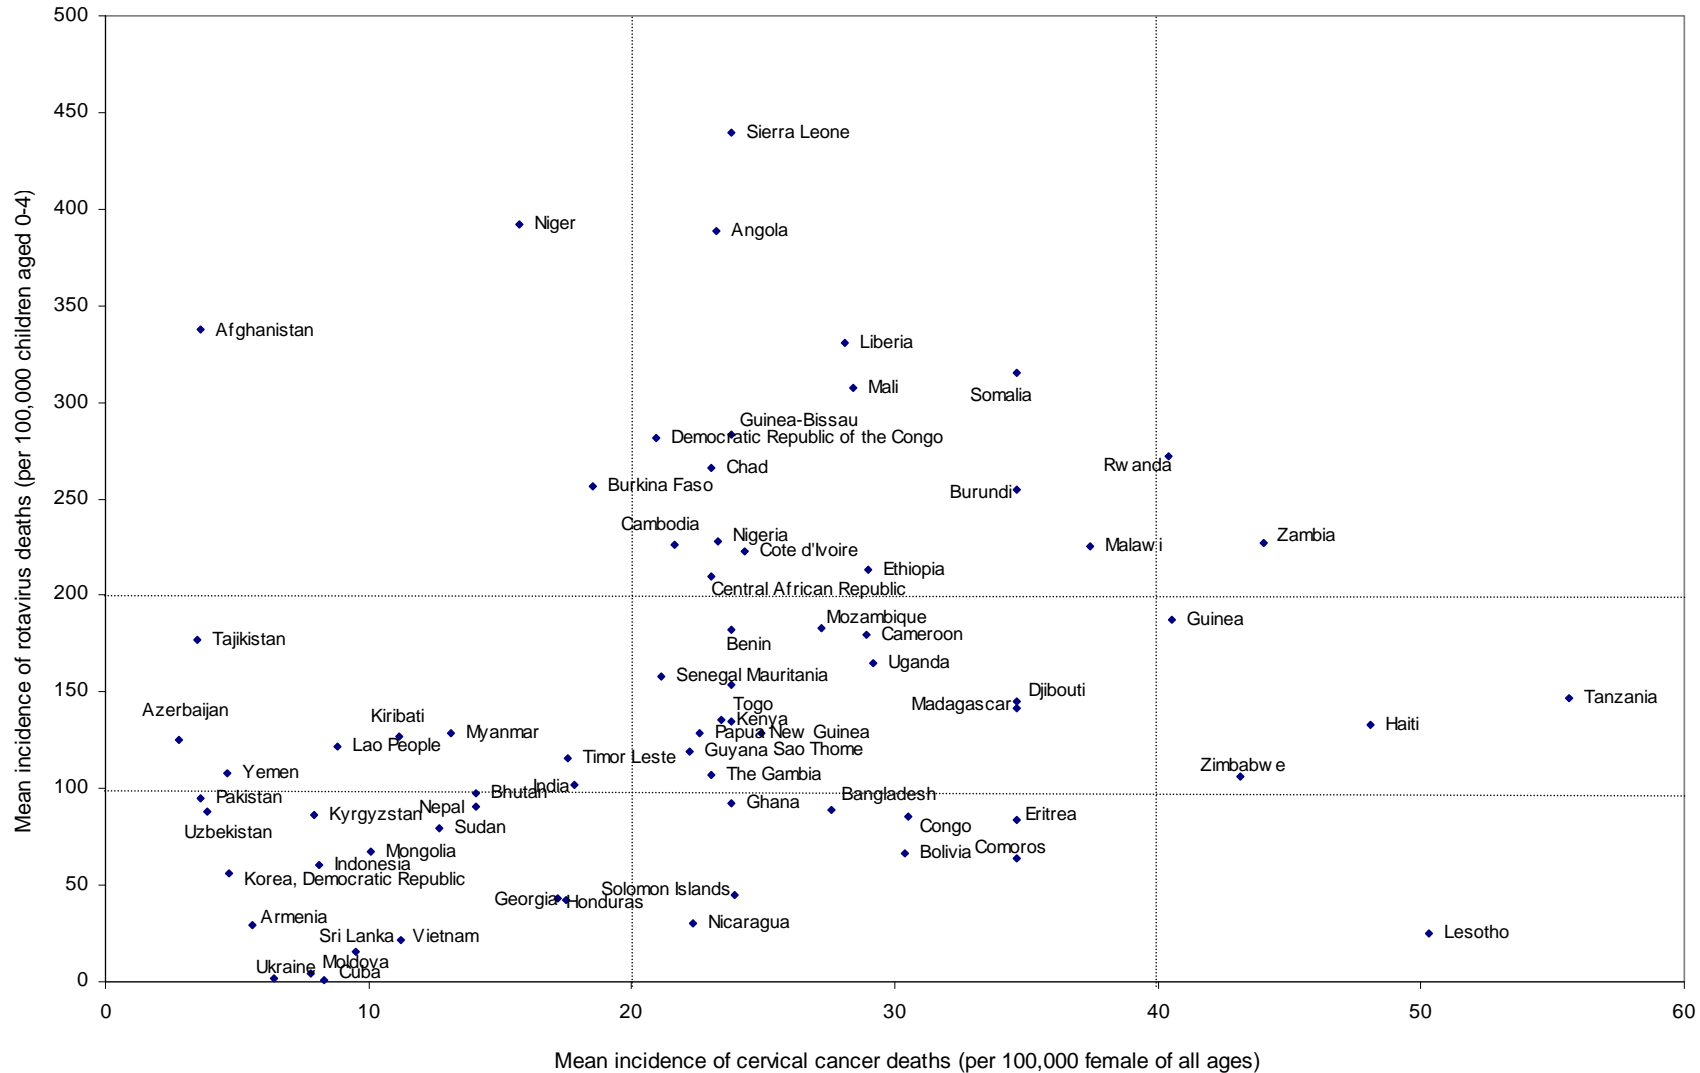

Supplement: MOESM2 [file 9442702]
